# Supplementary material for: Tailoring the electronic structure and acid–base properties of MgO by Ce doping promotes biomass-derived formic acid production at room temperature
Source: Royal Society of Chemistry journal article supplement (doi:10.1039/d5gc00008d), 2025-01-01
Supplement: d5gc00008d1.pdf [file d5gc00008d1.pdf]

## Supplementary Information

### 1. Experimental section

#### Calculation Methods

$$\text{Glucose conversion (\%)} = \frac{\text{mole of initial glucose} - \text{mole of glucose in product}}{\text{mole of initial glucose}} \times 100 \% \quad (S1)$$

$$\text{Product yield (\%)} = \frac{\text{mole of formed product}}{\text{mole of theoretical product}} \times 100 \% \quad (S2)$$

$$\text{FA selectivity (\%)} = \frac{\text{FA yield (\%)}}{\text{Glucose conversion (\%)}} \times 100 \% \quad (S3)$$

According to the equation of glucose oxidation to FA with H<sub>2</sub>O<sub>2</sub>:

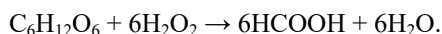

6 mol of H<sub>2</sub>O<sub>2</sub> are required to fully oxidize 1 mol of glucose. Consequently, the theoretical FA amount was calculated by Eq.(S4):

$$\text{Theoretical FA (mmol)} = \frac{\text{Initial glucose (mmol)} \times \text{FA stoichiometric number (6)}}{\text{Glucose stoichiometric number (1)}} \times 100 \% \quad (S4)$$

Similarly, the production of 1 mol arabinose, 1 mol glycolic acid (GA) and 1 mol acetic acid (AA) requires the consumption of 1 mol, 3 mol and 3 mol glucoses, respectively. Thus, theoretical by-product amount was also determined based on the relevant chemical equation S5, S6 and S7.

$$\begin{aligned} \text{Theoretical arabinose (mmol)} \\ = \frac{\text{Initial glucose (mmol)} \times \text{arabinose stoichiometric number (5)}}{\text{Glucose stoichiometric number (1)}} \times 100 \% \quad (S5) \end{aligned}$$

$$\begin{aligned} \text{Theoretical GA (mmol)} = \frac{\text{Initial glucose (mmol)} \times \text{GA stoichiometric number (3)}}{\text{Glucose stoichiometric number (1)}} \times 100 \% \\ (S6) \end{aligned}$$

$$\begin{aligned} \text{Theoretical AA (mmol)} = \frac{\text{Initial glucose (mmol)} \times \text{AA stoichiometric number (3)}}{\text{Glucose stoichiometric number (1)}} \times 100 \% \\ (S7) \end{aligned}$$

## 2. Supplementary Figures

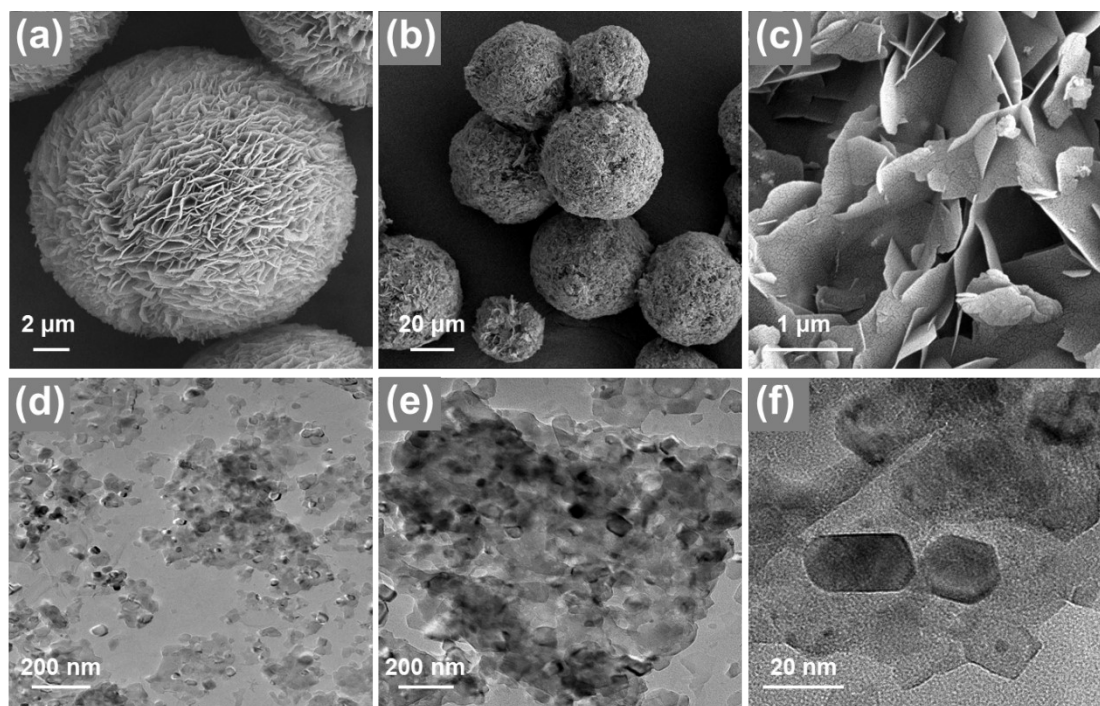

Figure S1. SEM image of (a) pristine MgO, (b) (c) Ce<sub>1.0%</sub>-MgO, (d) (e) and (f) TEM image of Ce<sub>1.0%</sub>-MgO.

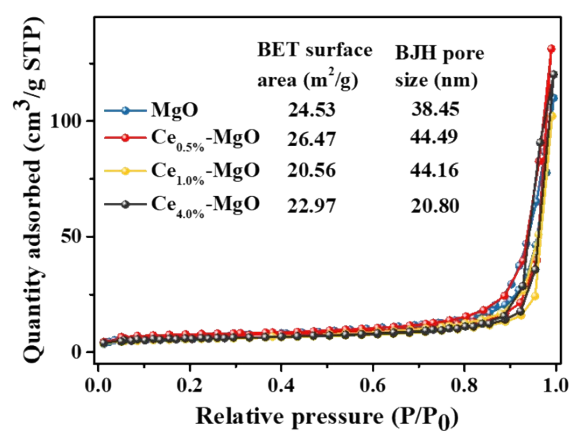

Figure S2. Nitrogen adsorption/desorption isotherm of MgO and Ce-MgO catalysts.

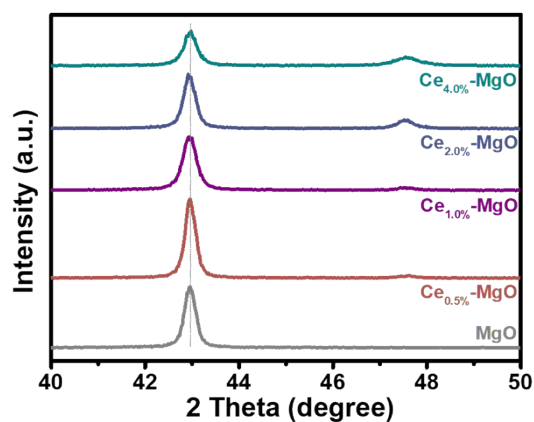

Figure S3. Partially enlarged XRD patterns of MgO and Ce-MgO catalysts.

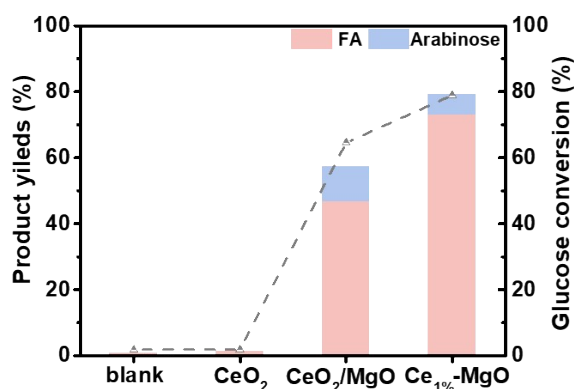

Figure S4. Product yields and glucose conversion of different catalysts (reaction conditions: 10 g·L<sup>-1</sup> glucose, 120 mg catalysts, 100% H<sub>2</sub>O<sub>2</sub>, 30 °C , 4 h).

Notes:

CeO<sub>2</sub> preparation method: a calculated amount of cerium nitrate hexahydrate (Ce(NO<sub>3</sub>)<sub>3</sub>·6H<sub>2</sub>O) were dissolved into 60 mL deionized water. Then, the mixed solution was slowly added dropwise to 0.7 mol/L (35 mL) potassium carbonate (K<sub>2</sub>CO<sub>3</sub>) solution. After stirring and precipitation, the separated precipitate was hydrothermally heated in an oven at 180°C for 2 h. The solid was washed several times and then calcined in a muffle furnace at 800°C for 5 h.

CeO<sub>2</sub>/MgO preparation method: The pure MgO prepared in the study was used as a carrier and

impregnated with a calculated amount of cerium nitrate hexahydrate ( $\text{Ce}(\text{NO}_3)_3 \cdot 6\text{H}_2\text{O}$ ) solution. The resulting solid was then calcined at 800 °C in air for 5 hours.

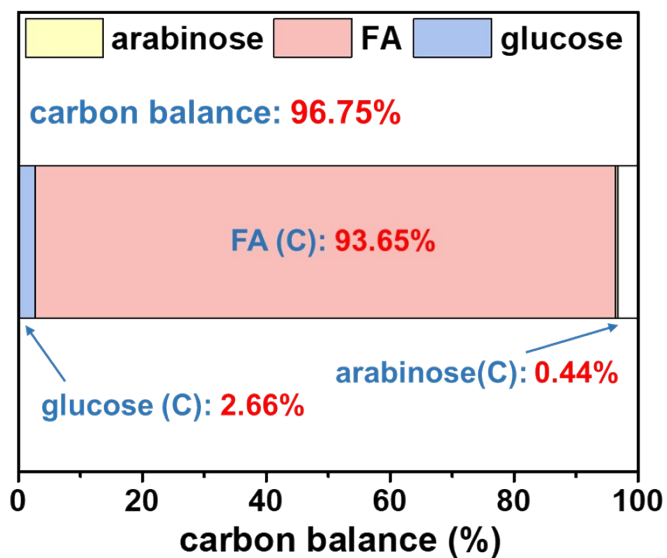

**Figure S5. Carbon balance obtained after oxidation reaction with  $\text{Ce}_{1.0\%}\text{-MgO}$  catalyst (reaction conditions: 5  $\text{g}\cdot\text{L}^{-1}$  glucose, 120 mg catalysts, 100%  $\text{H}_2\text{O}_2$ , 30°C, 4 h).**

Notes:

The total C input was 1.5 mmol. The detailed calculations are as follows:

From HPLC data, it was determined that the C-containing substances present in the liquid phase at the end of the reaction were glucose, arabinose and formic acid. The carbon concentrations of these were calculated separately as:

glucose (C):  $0.0067 \times 6 = 0.0402$  mmol, 2.66% of the total C

formic acid (C):  $1.405 \times 1 = 1.405$  mmol, 93.65% of the total C

arabinose (C):  $0.0013 \times 5 = 0.0066$  mmol, 0.44% of the total C

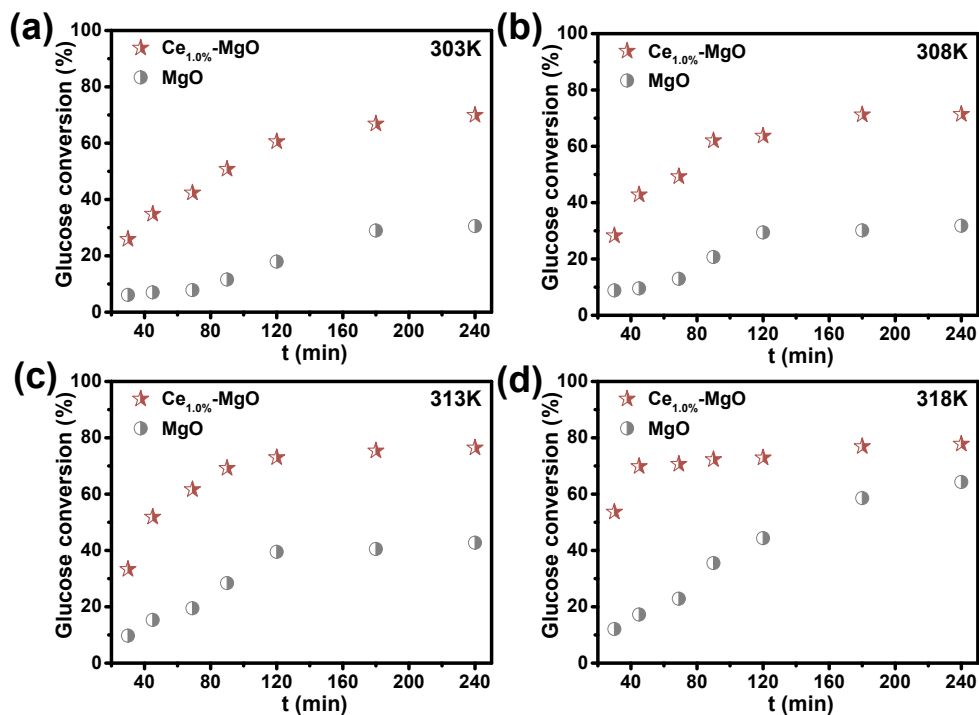

Figure S6. Variation of glucose conversion with time over Ce<sub>1.0%</sub>-MgO and MgO at (a) 303K, (b) 308K, (c) 323K and (d) 318K (reaction conditions: 10 g·L<sup>-1</sup> glucose, 120 mg catalysts, 100% H<sub>2</sub>O<sub>2</sub>, 4 h).

Notes:

The rate constant is calculated by the following equation:

$$\ln C_{A_t} = -kt \quad (S8)$$

Where  $C_{A_t}$  is the concentration of glucose at different times.

The activation energy is calculated according to Arrhenius equation:

$$\ln k = \frac{-E_a}{RT} + \ln A \quad (S9)$$

Where  $k$  is the reaction rate constant at different temperatures,  $R$  is the ideal gas constant,  $T$  is temperature, and  $A$  is the frequency factor.

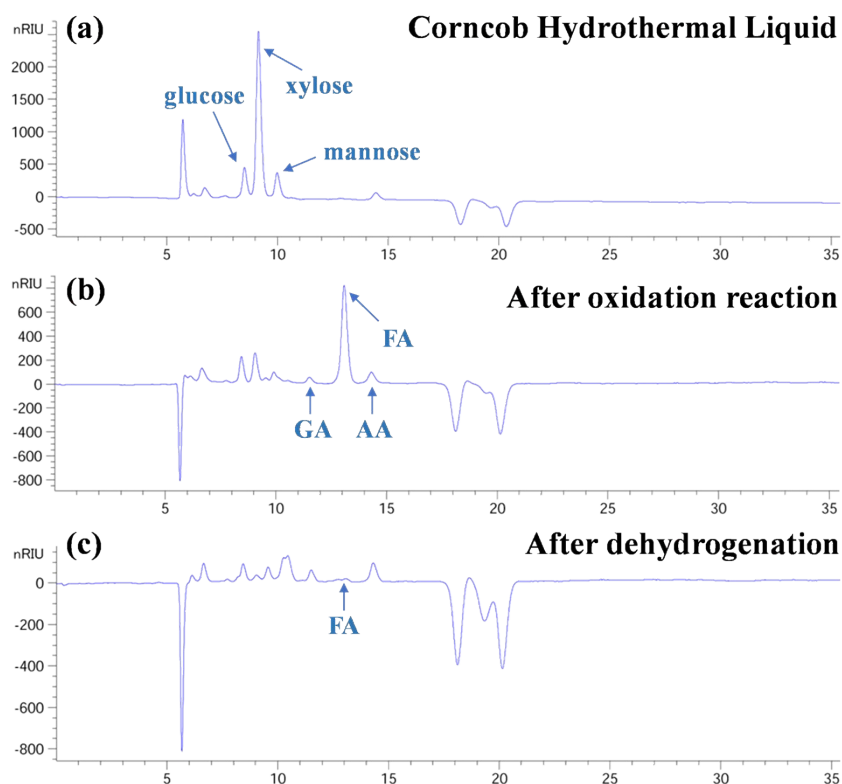

**Figure S7. HPLC spectrum of corn cob hydrothermal liquid, solution after oxidation reaction and after dehydrogenation.**

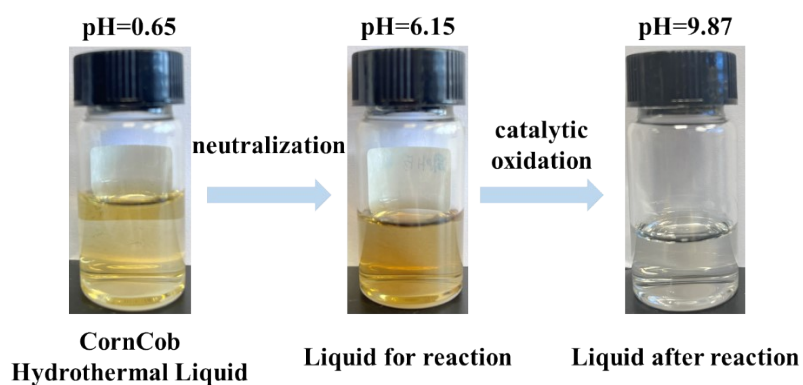

**Figure S8. Schematic diagram from corn cob hydrothermal liquid to FA.**

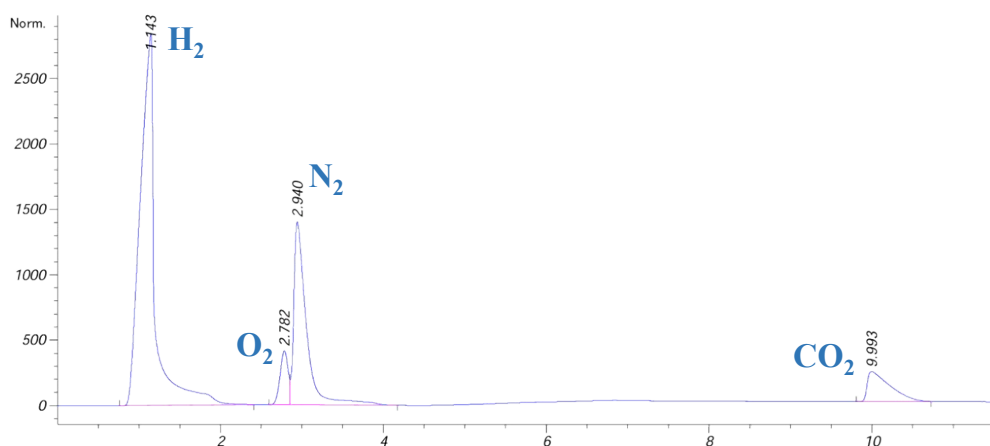

Figure S9. GC spectra of the product gas from the dehydrogenation reaction.

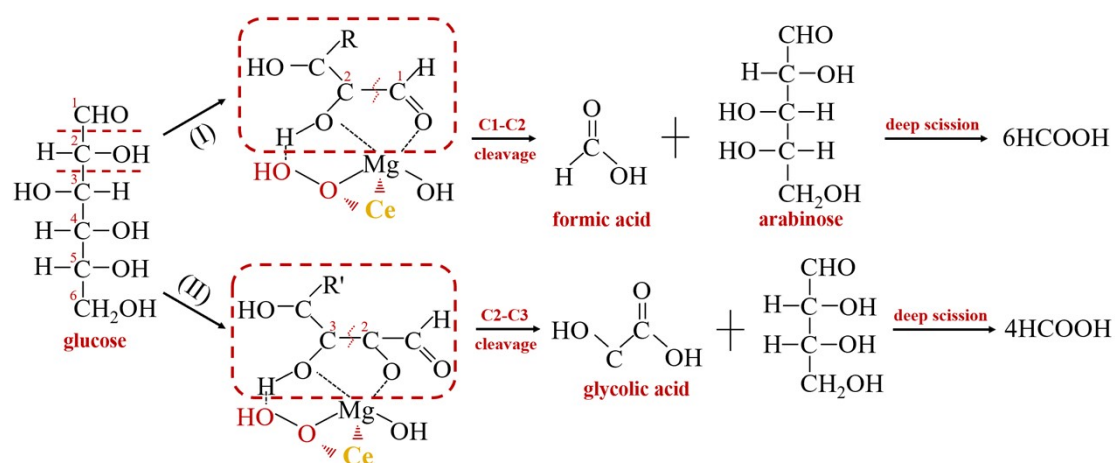

Figure S10. Proposed reaction pathway of glucose oxidation to FA over Ce-MgO catalyst ( $R = -(\text{CHOH})_2\text{CH}_2\text{OH}$ ,  $R' = -(\text{CHOH})\text{CH}_2\text{OH}$ ).

**Table S1. Binding energies and surface relative contents of Mn and O species over MnO<sub>x</sub> catalysts before and after reaction**

| Catalyst                | Mg 1s (eV) | O <sub>latt</sub> (eV) | Ce <sup>4+</sup> 3d <sub>3/2</sub> (eV) |
|-------------------------|------------|------------------------|-----------------------------------------|
| MgO                     | 1303.96    | 529.71                 | -                                       |
| Ce <sub>0.5%</sub> -MgO | 1303.45    | 529.51                 | 915.98                                  |
| Ce <sub>1.0%</sub> -MgO | 1303.35    | 529.00                 | 915.60                                  |
| Ce <sub>2.0%</sub> -MgO | 1303.57    | 529.53                 | 916.20                                  |
| Ce <sub>4.0%</sub> -MgO | 1303.70    | 529.50                 | 916.20                                  |

**Table S2. Quantitative analysis of NH<sub>3</sub>-TPD and CO<sub>2</sub>-TPD**

| Catalyst                | CO <sub>2</sub> -TPD<br>total consumption<br>(mmol·g <sup>-1</sup> ) | NH <sub>3</sub> -TPD<br>total consumption<br>(mmol·g <sup>-1</sup> ) |
|-------------------------|----------------------------------------------------------------------|----------------------------------------------------------------------|
| MgO                     | 0.183                                                                | 0.780                                                                |
| Ce <sub>1.0%</sub> -MgO | 1.393                                                                | 1.959                                                                |
| Ce <sub>4.0%</sub> -MgO | 1.069                                                                | 3.667                                                                |

**Table S3. Composition of corncob hydrolyzed solution**

| Components | Concentration (mol/L) |
|------------|-----------------------|
| Glucose    | 0.003                 |
| Xylose     | 0.021                 |
| Mannose    | 0.003                 |
